# Supplementary material
Source: publisher site journal article supplement (https://www.dovepress.com/article/491055)
Supplement: Supplementary file 1 [file get_supplementary_file.php]

**Supplementary Table 1** Univariate analysis for the presence of DVT

| Variable | OR (95%CI) | p-value |
| --- | --- | --- |
| Sex |  |  |
| Male | Reference |  |
| Female | 1.2 (0.67~2.13) | 0.541 |
| Age(years) | 1.05 (1.03~1.07) | <0.001 |
| Blood type |  |  |
| A | Reference |  |
| B | 0.71 (0.38~1.32) | 0.28 |
| O | 0.72 (0.39~1.33) | 0.297 |
| AB | 0.73 (0.28~1.9) | 0.521 |
| Smoking |  |  |
| Never | Reference |  |
| Current | 1.08 (0.64~1.84) | 0.768 |
| Former | 0.69 (0.25~1.9) | 0.478 |
| operation |  |  |
| No | Reference |  |
| Yes | 1.23 (0.59~2.57) | 0.585 |
| Onset to admission(day) | 0.99 (0.99~1) | <0.001 |
| Cause |  |  |
| hurt by a heavy object | Reference |  |
| accident injury | 1.75 (0.81~3.78) | 0.151 |
| fall injury | 1.57 (0.78~3.16) | 0.21 |
| tumor | 2.5 (0.66~9.46) | 0.177 |
| surgical injury | 0.77 (0.16~3.79) | 0.747 |
| disc compression | 0.29 (0.04~2.39) | 0.253 |
| others | 2.67 (1.16~6.15) | 0.021 |
| Fracture |  |  |
| No | Reference |  |
| Yes | 1.15 (0.61~2.14) | 0.672 |
| Spinal injury plane |  |  |
| cervical | Reference |  |
| thoracic | 1.05 (0.62~1.77) | 0.854 |
| lumbar | 0.49 (0.23~1.08) | 0.077 |
| sacral | NA | NA |
| ASIA |  |  |
| A | Reference |  |
| B | 1.02 (0.47~2.18) | 0.969 |
| C | 0.67 (0.33~1.37) | 0.277 |
| D | 0.35 (0.17~0.7) | 0.003 |
| E | 2.58 (0.16~42.08) | 0.505 |
| Hypertension |  |  |
| No | Reference |  |
| Yes | 1.09 (0.51~2.32) | 0.828 |
| Diabetes |  |  |
| No | Reference |  |
| Yes | 1.86 (0.76~4.54) | 0.173 |
| SII | 1.0003 (1.00003~1.00057) | 0.03 |

**Abbreviations:** SII, systemic immune-inflammation index; DVT, deep venous thrombosis; ASIA, American spinal injury association; OR, odds ratio.

**Supplementary Table 2** Stratified analyses for the association between SII and DVT in SCI patients.

| **Subgroup** |  | **Variable** | **Total** |  | **Event (%)** | **Crude OR (95%CI)** | **Crude P** | **Adj. OR (95%CI)** | **Adj. P_** | **P for interaction** |
| --- | --- | --- | --- | --- | --- | --- | --- | --- | --- | --- |
| **Sex** |  |  |  |  |  |  |  |  |  |  |
| **Male** |  | SII(×106/L) | 304 |  | 68 (22.4) | 1.41 (1.049~1.897) | 0.023 | 1.49 (1.051~2.112) | 0.0252 | 0.547 |
| **Female** |  | SII(×106/L) | 78 |  | 20 (25.6) | 1.019 (0.454~2.286) | 0.9645 | 0.928 (0.357~2.412) | 0.8789 |  |
| **Operation** |  |  |  |  |  |  |  |  |  |  |
| **No** |  | SII(×106/L) | 50 |  | 10 (20) | 1.39 (0.85~2.273) | 0.19 | 4.495 (0.396~51.074) | 0.2255 | 0.771 |
| **Yes** |  | SII(×106/L) | 332 |  | 78 (23.5) | 1.342 (0.972~1.852) | 0.0737 | 1.377 (0.976~1.944) | 0.0683 |  |
| **Hypertension** |  |  |  |  |  |  |  |  |  |  |
| **No** |  | SII(×106/L) | 341 |  | 78 (22.9) | 1.381 (1.037~1.839) | 0.0271 | 1.386 (1.005~1.912) | 0.0466 | 0.773 |
| **Yes** |  | SII(×106/L) | 41 |  | 10 (24.4) | 1.014 (0.386~2.661) | 0.9774 | 4.765 (0.306~74.314) | 0.2653 |  |
| **Diabetes** |  |  |  |  |  |  |  |  |  |  |
| **No** |  | SII(×106/L) | 359 |  | 80 (22.3) | 1.346 (1.027~1.765) | 0.0316 | 1.372 (1.018~1.848) | 0.0377 | 0.842 |
| **Yes** |  | SII(×106/L) | 23 |  | 8 (34.8) | 1.822 (0.297~11.177) | 0.5166 | 0.429 (0.001~293.989) | 0.7993 |  |

**Abbreviations:** SII, systemic immune-inflammation index; deep venous thrombosis; OR, odds ratio; CI, confidence interval; Adj, adjusted.
